# Supplementary material
Source: PubMed Central journal article supplement (PMC4801454)

## Supplementary results

### ***ELISPOT Assay***

The specific recognition of TAAs and/or HLA-matched allogeneic melanoma cell lines by *ex vivo* isolated PBMCs was determined using an IFN- $\gamma$ -release assay (ELISPOT) (Parmiani G. *et al. OncoImmunol*, 2015). Anti-human IFN- $\gamma$  mAb (1-D1K), the secondary biotin-conjugated anti-IFN- $\gamma$  mAb (7-B6-1) and the secondary alkaline phosphatase-streptavidin were purchased from Mabtech (Naka Stand, Sweden). PBMCs ( $3 \times 10^4$  cells/well) were incubated in flat bottom 96-well plates in the presence of  $1.7 \times 10^4$  target cells/well. The cell lines T2 (HLA-2<sup>+</sup>), 1061 EBV-B (HLA-A1<sup>+</sup>) or 1869 EBV-B (HLA-A3<sup>+</sup> and A24<sup>+</sup>) cells were used as antigen presenting cells according to the HLA typing of MM patients and pulsed with 10  $\mu$ g/ml of each of the following peptides: HLA-A2-restricted Melan-A/MART-1 (AAGIGILTV), gp100 (KTWGQYWQV, ITDQVPFSV and YLEPGPVTA), MAGE-A2 (YLQLVFGIEV and KMVELVHFL), MAGE-A3 (FLWGPRALV), NY-ESO-1 (SLLMWITQCFL), Tyr (YMDGTMSQV) SVV-1 (ELTLGEFLKL and TLPPAWQPFL), H-TERT (ILAKFLHWL and RLVDDFLLV), SOX-2 (ALSPASSRSV) or HLA-A1-restricted MAGE-A3 (EADPTGHSY) MAGE-A1 (SLFRAVITK and EVDPIGHLY), gp100 (ALLAVGATK and SLIYRRRLMK) or HLA-A3-restricted MAGE-A1 (SLFRAVITK), gp100 (SLIYRRRLMK and ALLAVGATK), or A24-restricted MAGE-A2 (EYLQLVFGI), gp100 (VYFFLPDHL), TYR (AFLPWHRLF), SVV-1 (AYACNTSTL) peptides (JPT Peptide Technologies, Berlin, Germany) (Novellino *et al., Cancer Immunol Immunother*, 2004). A panel of HLA-matched or, as control, unmatched allogeneic melanoma cell lines were used as target cells as well. The T cell recognition specifically HLA class I-restricted was determined by the inhibition of the IFN- $\gamma$  release after pre-incubation of melanoma cells with the W6/32 (anti-HLA-A, B, C molecules) mAb (ATCC). T lymphocytes incubated with phytohemagglutinin (PHA) and concanavalin-A (ConA) (Sigma-Aldrich) were used as positive control for IFN- $\gamma$  secretion. K562 target cells were used as control for NK-type-mediated reactivity.

Results represent averages of triplicates, subtracted of the background, with SD  $\leq$  10%; statistical analysis of differences between means for cytokine release assays was performed using two-tailed t-test ( $p < 0.05$ ). PBMCs isolated from healthy donors

used for ELISPOT assay as described above represented the sample control for circulating T-cell mediated reactivity against TAAs and melanoma cell lines.

#### **Tumor cell lines used for ELISPOT assay**

The melanoma cell lines used as target cells in ELISPOT assay were: #0342, 1061, 1067, 4478D, 25368 and were established *in vitro* from human melanoma tissues at the Unit of Immuno-biotherapy of Melanoma and Solid Tumors, San Raffaele Foundation Centre, Milan, Italy. Other cell lines used were the 501 mel (a gift of Dr. Paul F. Robbins, Surgery Branch, NCI, Bethesda MD), the 15392 mel (kindly provided by Dr. Chiara Castelli, Istituto Nazionale Tumori, Milan, Italy), the Jofr-1A and Daju cell lines (kindly provided by Dr. Pierre Coulie, de Duve Institute and the Université Catholique de Louvain, Belgium), the 1061 EBV-B (HLA-A\*01) established at the at the Unit of Immuno-biotherapy of Melanoma and Solid Tumors, San Raffaele Foundation Centre, and the T2 and K562 cells (ATCC). All the lines were cultured with RPMI 1640 plus 10% FBS (Lonza), 20 mM HEPES, penicillin (200 U/ml), streptomycin (200 ug/ml) and 2mM Glutamax (Invitrogen).

#### **Legends to the Figures:**

##### ***Figure 1S: Representative gating strategy for IF and cytofluorimetric analysis***

PBMCs were stained according the panels described in Table 1S.  $1 \times 10^5$  events were acquired for cytofluorimetric analysis. Lymphocytes cells were gated based on physical parameters (Panel A) and sequentially gated cells were analysed on CD3<sup>+</sup> cells (Panel B), on CD3<sup>+</sup>CD8<sup>+</sup> (Panel C), on CD3<sup>+</sup>CD4<sup>+</sup> (Panels D and F). More subpopulations were gated on CD45RA<sup>+</sup>, CD45RO<sup>+</sup> and on TH17 cells (data not shown). For details *see Material and Methods session*.

##### ***Figure 2S: Detection of sNKG2DLs in the serum of MM patients.***

The presence of soluble NKG2DLs was measured by ELISA assay (*see Material and Methods*) in the serum at baseline (N=37; black circle), W12 (N=37; black square) and W24 (N=21; black triangle) post-treatment in MM patients undergoing IPI plus FTM treatment in the context of NIBIT-M1 study. As control the presence of soluble NKG2DLs was assessed in the serum of N=10 HD. All sera from HD resulted

negative for the presence of these molecules; only in two subjects 44 and 50 pg/ml of either ULBP-1 or ULBP-2, respectively were detected (*data not shown*). Horizontal bars represent the means (Panels A, B and C); standard deviation for normal distribution of sULBP3 has been shown in Panel C as well. Differences in means were assessed with the Student t-test ( $p < 0.01$ ).

**Figure 3S: T cell responses against MAAs and melanoma cell lines in PBMC of melanoma patients enrolled in the NIBIT-M1 study.**

*Ex-vivo* isolated PBMCs from melanoma patients #006 (Panel A), 009 (Panel B), were used to assess their reactivity against MAA-derived peptides on HLA-A\*01<sup>+</sup> 1061 EBV-B (Panel A) or HLA-A\*0201<sup>+</sup> T2 cells (Panel B) and allogeneic HLA-matched tumor cell lines. IFN- $\gamma$  release was measured by ELISpot assay and data are expressed as N. of spots/ $3 \times 10^4$  cells and are subtracted of the background of spontaneous release IFN- $\gamma$  release of either T cell alone or incubated with EBV-B or T2 cells alone. The assay was performed in triplicates and their averages with  $SD \leq 10\%$  were calculated. Each assay was performed twice and results represent averages of N. of spots/ $3 \times 10^4$  obtained from two experiments. Statistical analysis of differences between means of IFN- $\gamma$  released by T cells was performed by two-tailed t-Test ( $p < 0.05$ )



|                               |                                                                        |  |  |  |  |  |  |  |  |  |  |
|-------------------------------|------------------------------------------------------------------------|--|--|--|--|--|--|--|--|--|--|
| <b>Intracellular staining</b> |                                                                        |  |  |  |  |  |  |  |  |  |  |
| <b>CTRL -</b>                 | <b>Tube 12</b>                                                         |  |  |  |  |  |  |  |  |  |  |
| Unstained                     | CD4-FITC<br>IL-17-<br>Alexa<br>Fluor 700<br><br>CD8-PB<br>CD3-<br>V500 |  |  |  |  |  |  |  |  |  |  |

CTRL-: Control sample for setting of physical parameters for cytofluorimetric analysis; it was represented by unstained PBMCs. The mAbs were combined in each single tube as indicated in the Table; for details see *Material and Methods session*.

**Table 2S. MAA and/or tumor reactivity by PBMCs from melanoma patients undergoing *IPI* + FTM treatment**

| <b>Antigen reactivity</b> | <b>Baseline <sup>a</sup></b> | <b>W12 <sup>b</sup></b>          |                                         |                         |
|---------------------------|------------------------------|----------------------------------|-----------------------------------------|-------------------------|
|                           |                              | <b>Pre-existing <sup>c</sup></b> | <b>Augmented responses <sup>d</sup></b> | <b>New <sup>e</sup></b> |
| MAGE- A1                  | <b>2</b>                     | 1                                | 0                                       | <b>4</b>                |
| MAGE-A2                   | <b>1</b>                     | 0                                | 0                                       | <b>2</b>                |
| MAGE-A3                   | 0                            | 0                                | 0                                       | 0                       |
| NY-ESO-1                  | 0                            | 0                                | 0                                       | <b>4</b>                |
| MART-1                    | <b>2</b>                     | 1                                | 0                                       | <b>3</b>                |
| Gp100                     | <b>3</b>                     | 2                                | <b>1</b>                                | <b>3</b>                |
| Tyros.                    | <b>9</b>                     | 7                                | <b>4</b>                                | <b>1</b>                |
| h-TERT                    | <b>5</b>                     | 1                                | <b>4</b>                                | 0                       |
| SVV-1                     | 0                            | 0                                | 0                                       | <b>1</b>                |
| SOX-2                     | 0                            | 0                                | 0                                       | 0                       |
| <b>Tumor reactivity</b>   | <b>Baseline <sup>a</sup></b> | <b>W12 <sup>b</sup></b>          |                                         |                         |
|                           |                              | <b>Pre-existing <sup>c</sup></b> | <b>Augmented responses <sup>d</sup></b> | <b>New <sup>e</sup></b> |
| HLA-A1                    | 0                            |                                  |                                         |                         |
| HLA-A2                    | <b>5</b>                     | 2                                | <b>3</b>                                | <b>2</b>                |
| HLA-A3                    | <b>4</b>                     | 3                                | 0                                       | 0                       |

PBMCs from MM patients (N=23) at baseline (a) and W12 (b) post-IPI plus FTM treatment were used to assess by IFN- $\gamma$  release assay (ELISPOT) the reactivity against MAAs and HLA-matched allogeneic tumor cells.

<sup>a</sup> N. of patients with T cell-mediated reactivity against the indicated MAA or HLA-matched melanoma cell lines;

<sup>c</sup> N. of patients with T cell-mediated reactivity against the indicated MAA or HLA-matched melanoma cell lines that were already detected at baseline;

<sup>d</sup> N. of patients with T cell responses against the indicated MAA or HLA-matched melanoma cell lines augmented (at least twice the mean of the N. of spot/3 x 10<sup>4</sup> cells) as compared with baseline;

<sup>e</sup> Newly induced post-treatment T cell responses against the indicated MAA or HLA-matched melanoma cell lines.

Figure 1S. Representative gating strategy of IF and cytofluorimetric analysis of PBMC

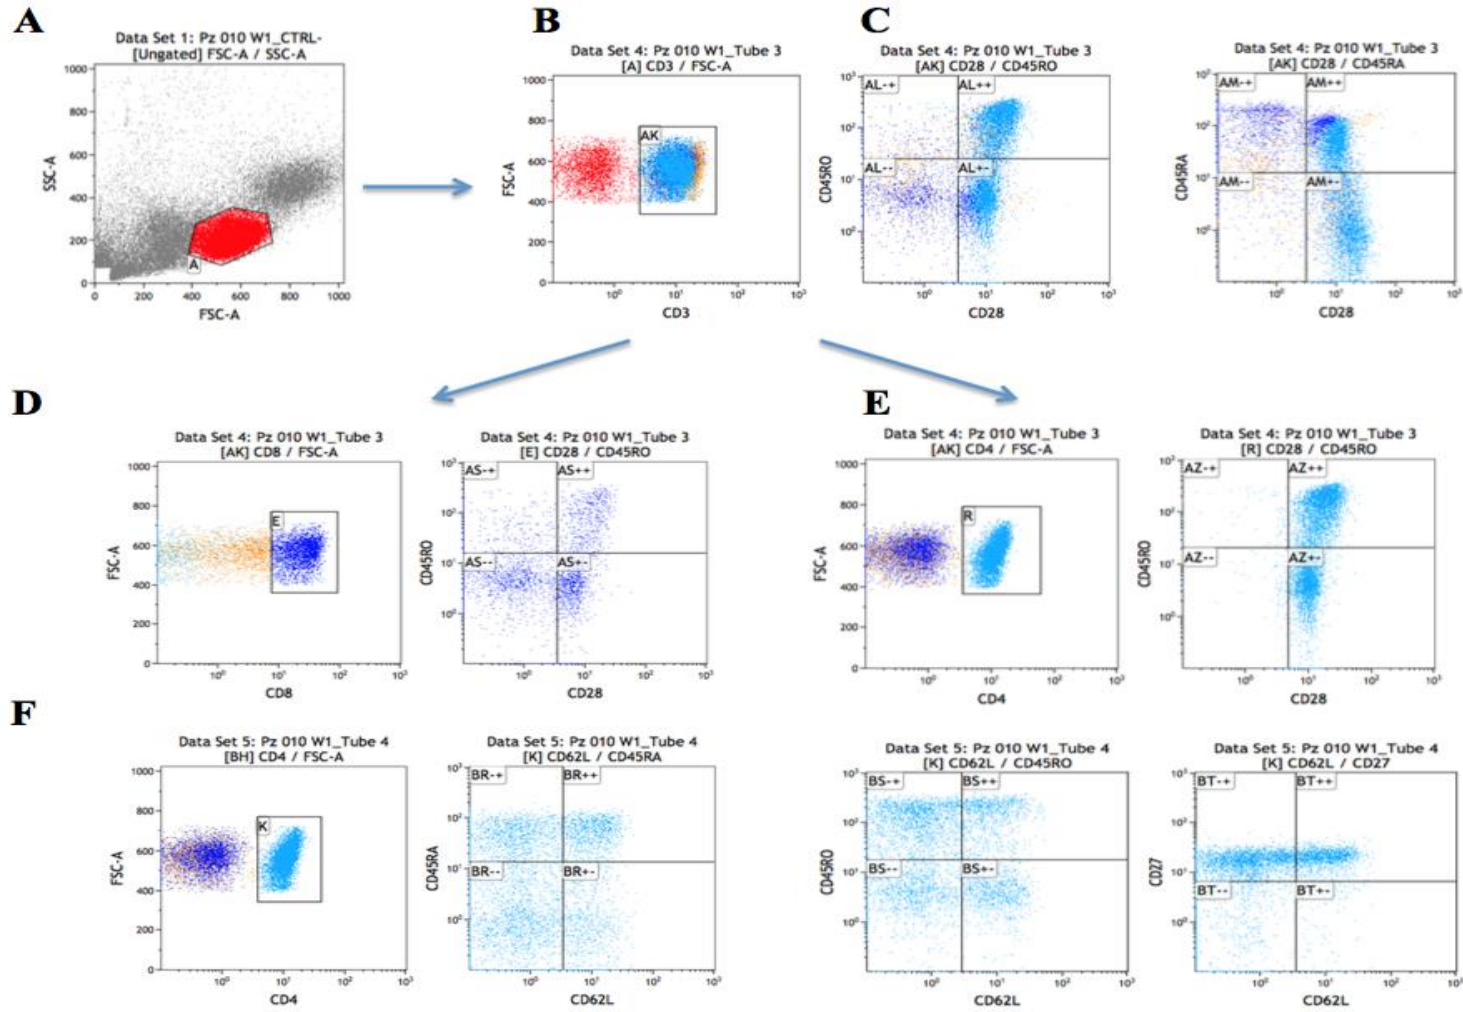



Figure 2S

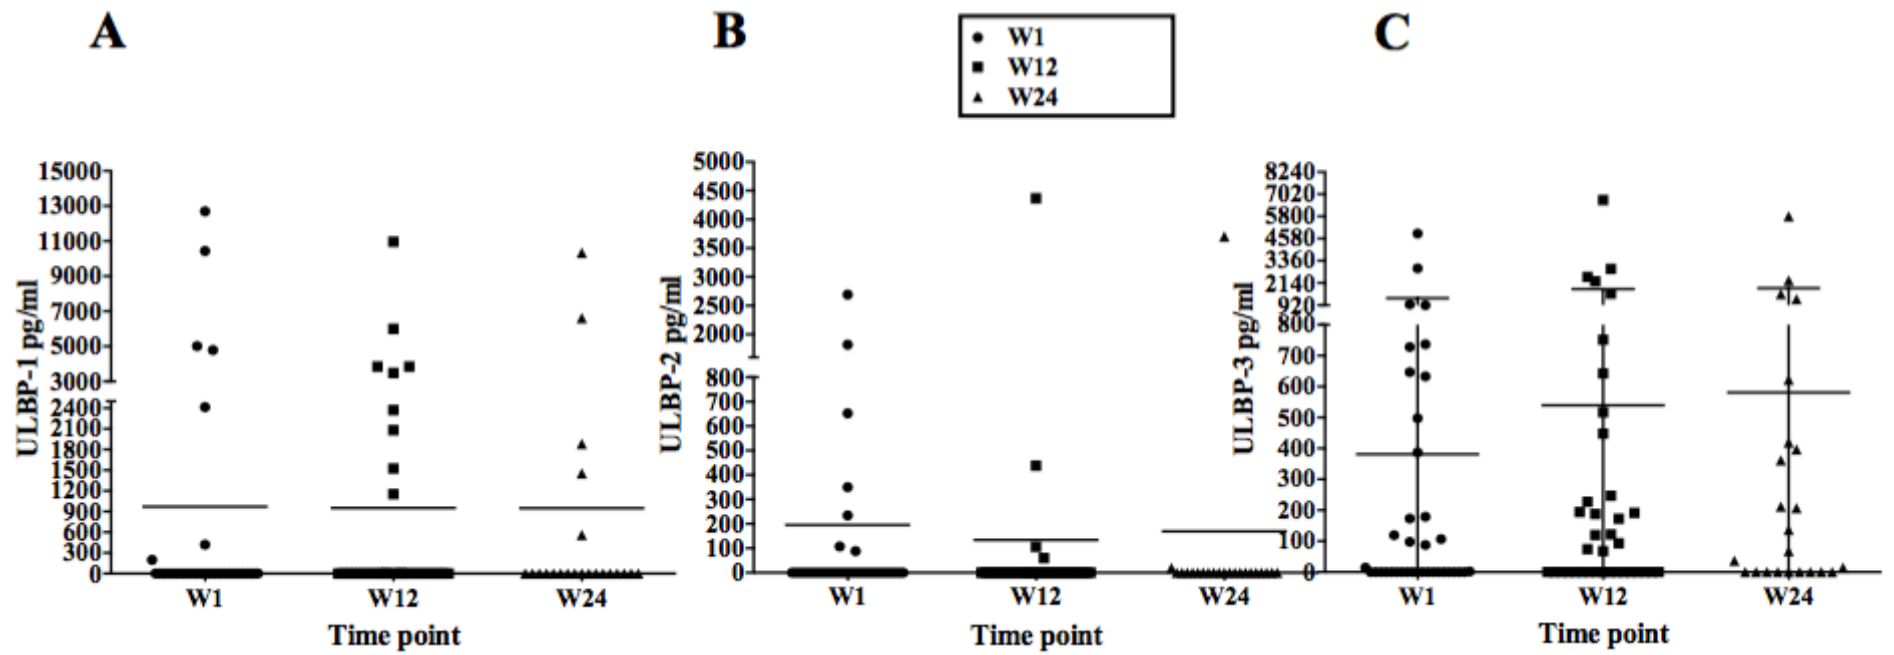

**Figure 3S**  
**A**

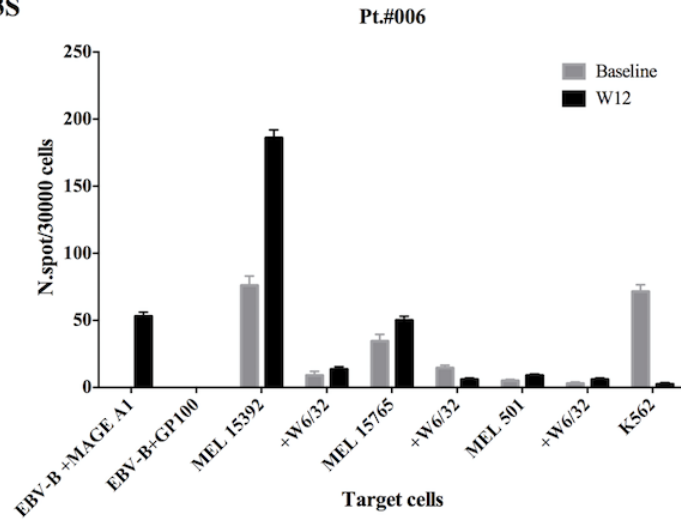

**B**

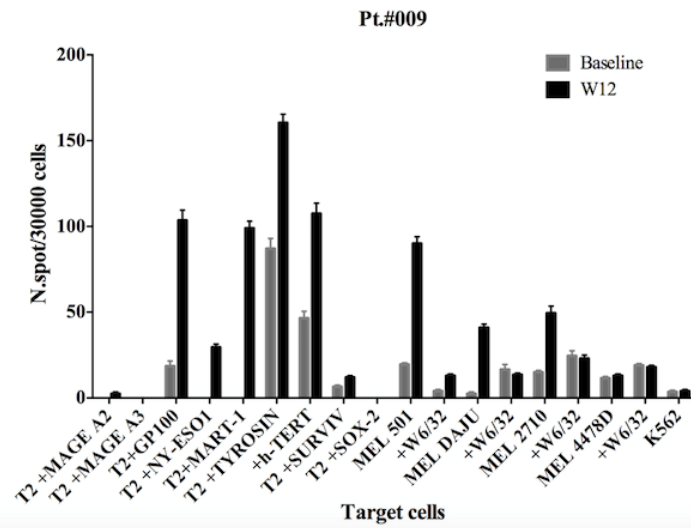

Supplement: koni-05-02-1071007-s001.pdf [file koni-05-02-1071007-s001.pdf]
